# Supplementary material
Source: PubMed Central journal article supplement (PMC6426929)
Supplement: 12264_2019_343_MOESM1_ESM.pdf [file 12264_2019_343_MOESM1_ESM.pdf]

Supplementary material

**Correlations Between Single Nucleotide Polymorphisms, Cognitive Dysfunction, and Postmortem Brain Pathology in Alzheimer's Disease Among Han Chinese**

Qian Yang<sup>1,2</sup>, Kang Chen<sup>2,3</sup>, Hanlin Zhang<sup>2,3</sup>, Wanying Zhang<sup>4</sup>, Changlin Gong<sup>2,3</sup>, Qing Zhang<sup>1,2</sup>, Pan Liu<sup>1,2</sup>, Tianyi Sun<sup>1,2</sup>, Yuanyuan Xu<sup>5</sup>, Xiaojing Qian<sup>1</sup>, Wenying Qiu<sup>1\*</sup>, Chao Ma<sup>1\*</sup>

**Table S1.** Demographic and clinical characteristics of participants classified by global ECog score.

| Global ECog Score | Gender               |                        |                       | Age at death (years) | Education (years) |
|-------------------|----------------------|------------------------|-----------------------|----------------------|-------------------|
|                   | Male<br><i>n</i> (%) | Female<br><i>n</i> (%) | Total<br><i>n</i> (%) |                      |                   |
| 1                 | 42 (63)              | 25 (37)                | 67 (61)               | 77 ± 14.7            | 11.3 (0.0, 16.0)  |
| 1-2               | 6 (35)               | 11 (65)                | 17 (15)               | 75 ± 12.7            | 12.1 (0.0, 18.0)  |
| >2                | 17 (65)              | 9 (35)                 | 26 (24)               | 84 ± 10              | 12.1 (5.0, 18.0)  |
| Total             | 65 (59)              | 45 (41)                | 110 (100.0)           | 78 ± 13.7            | 11.6 (0.0, 18.0)  |

Age at death is expressed as mean ± SD while education and postmortem delay are expressed as median (minimum, maximum). Numbers in parentheses meant column percentage unless otherwise indicated.

**Table S2.** Demographic and clinical characteristics of subjects classified by ABC score.

| ABC Score | Gender               |                        |                       | Age at death (years) | Education (years) | Post-mortem delay (h) |
|-----------|----------------------|------------------------|-----------------------|----------------------|-------------------|-----------------------|
|           | Male<br><i>n</i> (%) | Female<br><i>n</i> (%) | Total<br><i>n</i> (%) |                      |                   |                       |
| 0         | 17 (53)              | 15 (47)                | 32(28)                | 74 ± 15.1            | 12.2 (0.0, 16.0)  | 17.7 (4.0, 41.0)      |
| 1         | 26 (68)              | 12 (32)                | 38(35)                | 75 ± 13.3            | 11.0 (0.0, 16.0)  | 14.1 (1.5, 41.0)      |
| 2         | 17 (65)              | 9 (35)                 | 26(24)                | 85 ± 13.1            | 11.2 (5.0, 18.0)  | 18.4 (3.0, 57.0)      |
| 3         | 4 (29)               | 10 (71)                | 14(13)                | 82 ± 8.4             | 12.6 (0.0, 16.0)  | 8.5 (3.0, 94.0)       |
| Total     | 64 (58)              | 46 (42)                | 110 (110.0)           | 78.1 ± 13.8          | 11.6 (0.0, 18.0)  | 16.2 (1.5, 94.0)      |

Age at death is expressed as mean ± SD while education and postmortem delay are expressed as median (minimum, maximum). Numbers in parentheses mean column percentage unless otherwise indicated.

**Table S3.** Spearman correlations between ECog scores, ABC scores, and demographic variables.

|           | Global<br>ECog     | Memory             | Language           | Spatial            | Planning           | Organiz<br>ation   | Divided<br>Attention | General<br>ABC<br>score | A                  | B                    | C                    |
|-----------|--------------------|--------------------|--------------------|--------------------|--------------------|--------------------|----------------------|-------------------------|--------------------|----------------------|----------------------|
| Gender    | -0.013<br>(0.896)  | -0.072<br>(0.465)  | -0.028<br>(0.777)  | -0.030<br>(0.766)  | -0.079<br>(0.423)  | -0.046<br>(0.640)  | -0.074<br>(0.456)    | 0.109<br>(0.269)        | 0.105<br>(0.288)   | 0.156<br>(0.113)     | 0.024<br>(0.812)     |
| Age       | 0.295**<br>(0.002) | 0.319**<br>(0.001) | 0.267**<br>(0.006) | 0.274**<br>(0.005) | 0.301**<br>(0.002) | 0.280**<br>(0.004) | 0.281**<br>(0.004)   | 0.478**<br>(<0.001)     | 0.297**<br>(0.002) | 0.554***<br>(<0.001) | 0.517***<br>(<0.001) |
| Education | 0.089<br>(0.367)   | 0.081<br>(0.414)   | 0.137<br>(0.165)   | 0.123<br>(0.214)   | 0.174<br>(0.007)   | 0.116<br>(0.242)   | -0.169<br>(0.086)    | 0.002<br>(0.981)        | -0.030<br>(0.761)  | 0.001<br>(0.992)     | 0.019<br>(0.849)     |

The results are displayed as correlation coefficients (*P* value) in each cell. \**P* <0.05 (2-tailed). \*\**P* <0.01 (2-tailed). \*\*\**P* <0.001 (2-tailed).
